1 **Characterization of mating type genes in heterothallic *Neonectria* species with**  
2 **emphasis on *N. coccinea*, *N. ditissima*, and *N. faginata***

3

4 Cameron M. Stauder<sup>1</sup>, Jeff R. Garnas<sup>2</sup>, Eric W. Morrison<sup>2</sup>, Catalina Salgado-Salazar<sup>3</sup>,  
5 Matt T. Kasson<sup>1</sup>

6 <sup>1</sup> Division of Plant and Soil Sciences, West Virginia University, Morgantown, WV, USA

7 <sup>2</sup> Department of Natural Resources and the Environment, University of New Hampshire,  
8 NH, USA

9 <sup>3</sup> Mycology and Nematology Genetic Diversity and Biology Laboratory, United States  
10 Department of Agriculture, Agricultural Research Service, Beltsville, MD, USA

11

12 **Abstract**

13 *Neonectria ditissima* and *N. faginata* are canker pathogens involved in an insect-fungus  
14 disease complex of American beech (*Fagus grandifolia*) commonly known as beech  
15 bark disease (BBD). In Europe, both *N. ditissima* and *N. coccinea* are involved in BBD  
16 on European beech (*Fagus sylvatica*). Field observations across the range of BBD  
17 indicate that new infections occur primarily via ascospores. Both heterothallic (self-  
18 sterile) and homothallic (self-fertile) mating strategies have been reported for *Neonectria*  
19 fungi. As such, investigations into mating strategy are important for understanding both  
20 the disease cycle and population genetics of *Neonectria*. This is particularly important in  
21 the U.S. given that over time *N. faginata* dominates the BBD pathosystem despite high  
22 densities of non-beech hosts for *N. ditissima*. This study utilized whole-genome  
23 sequences of BBD-associated *Neonectria* spp. along with other publicly available  
24 *Neonectria* and *Corinectria* genomes and *in vitro* mating assays to characterize mating  
25 type (MAT) loci and confirm thallism for select members of *Neonectria* and *Corinectria*.  
26 MAT gene-specific primer pairs were developed to efficiently characterize the mating  
27 types of additional single ascospore strains of *N. ditissima*, *N. faginata*, and *N. coccinea*  
28 and several other related species lacking genomic data. *In vitro* mating assays were  
29 used in combination with molecular results to confirm thallism. These assays also  
30 confirmed the sexual compatibility among *N. ditissima* strains from different plant hosts.  
31 Maximum likelihood phylogenetic analysis of both MAT1-1-1 and MAT1-2-1 sequences  
32 recovered trees with similar topology to previously published phylogenies of *Neonectria*  
33 and *Corinectria*. The results of this study indicate that all *Neonectria* and *Corinectria*

34 tested are heterothallic based on our limited sampling and, as such, thallism cannot  
35 help explain the inevitable dominance of *N. faginata* in the BBD pathosystem.

36

37 **Keywords:** mating type, heterothallic, *Nectriaceae*; beech bark disease, Nectria canker,  
38 *Nectria galligena*, *Corinectria fuckeliana*, genome

## 39 Introduction

40 Beech bark disease (BBD), a canker disease complex arising from interactions  
41 among insect and fungal causal agents, has significantly impacted the health of  
42 American (*Fagus grandifolia* Ehrh.) and European (*Fagus sylvatica* L.) beech forests  
43 throughout North America and Europe over the last century (Cale et al. 2017; Ehrlich  
44 1934; Thomsen et al., 1949). More recently, BBD has intensified in areas where historic  
45 cold temperatures have kept the disease in check, raising concerns for the impact that  
46 global climate change may have on the expansion of this disease and other plant  
47 pathogens (Dukes et al. 2009; Kasson and Livingston 2012; McCullough and Wieferich  
48 2001; McLaughlin and Greifenhagen 2012).

49 Beech bark disease requires prior infestation by a non-native scale insect  
50 *Cryptococcus fagisuga* Lind., which predisposes the host's bark tissues to subsequent  
51 invasion by one or more closely related canker fungi: *Neonectria ditissima* ([Tul. & C.  
52 Tul.] Samuels & Rossman), *N. faginata* ([Lohman, Watson, & Ayres] Castl. & Watson),  
53 and *N. coccinea* ([Pers.] Rossman and Samuels) (Houston 1994b; Thomsen et al.  
54 1949). *Neonectria ditissima* (formerly *N. galligena* Bres.) has been implicated in BBD  
55 both in the U.S. and in Europe while *N. faginata* (formerly *N. coccinea* var. *faginata*  
56 (Pers.:Fr.) Fr. Var. Lohman, A. M. Watson, & Ayers) appears restricted to American  
57 beech in the U.S. and *N. coccinea* to European beech in Europe (Thomsen et al. 1949;  
58 Castlebury et al. 2006). *Bionectria ochroleuca* ([Schwein.] Schroers & Samuels) has  
59 also been implicated in the U.S., but its role in BBD is not well understood (Houston et  
60 al. 1987).

61           *Neonectria ditissima* is perhaps best known as the causal agent of perennial  
62 target canker on many non-beech hosts including birch, maple, and walnut among  
63 others (Lohman and Watson 1943; Spaulding et al. 1936; Booth 1967). *Neonectria*  
64 *faginata* is unique to the BBD pathosystem in that it has only been observed causing  
65 annual cankers on American beech trees following *C. fagisuga* infestation (Castlebury  
66 et al. 2006). Other native plant hosts of *N. faginata* have not been detected. Unlike *N.*  
67 *ditissima* and *N. faginata*, *N. coccinea* is known to persist endophytically  
68 (asymptomatically) in the bark of European beech, with the ability to initiate disease  
69 following wounding, including but not limited to damage inflicted by *C. fagisuga*  
70 (Chapela and Boddy 1988; Hendry et al. 2002). When present, fruiting structures of  
71 *Neonectria* species are easily recognizable as bright red or orange, globose sexual  
72 ascocarps (perithecia) bearing uniseptate, hyaline ascospores. While perithecia are  
73 often products of mating between two distinct thalli of the opposite mating type, self-  
74 fertility (homothallism) can lead to the completion of the sexual cycle through selfing,  
75 which has been previously confirmed for members of the Nectriaceae (Alexopolous et  
76 al. 1996; Yun et al. 2000).

77           Sexual reproduction in Ascomycetes is generally understood to be regulated by  
78 the presence of one or both mating-type (MAT) idiomorphs (MAT1-1 and MAT1-2) at a  
79 mating type locus (Coppin et al. 1997; Turgeon 1998). The term “idiomorph” refers to  
80 sequences which encode different functional proteins but are found occupying the same  
81 locus in different strains. For heterothallic ascomycetes, three genes (MAT1-1-1, MAT1-  
82 1-2, and MAT1-1-3) are commonly found at the MAT locus for the MAT1-1 mating type

83 while two genes (MAT1-2-1 and MAT1-2-2) often occur at this locus for the MAT1-2  
84 mating type (Coppin et al. 1997; Pöggeler and Kück 2000).

85         These mating type idiomorphs encode polypeptides responsible for the  
86 regulation of the sexual mating cycle in filamentous fungi (Kronstad and Staben 1997).  
87 For the MAT1-1 idiomorph, MAT1-1-1, MAT1-1-2, and MAT1-1-3 encode proteins with  
88 an  $\alpha$  domain, a PPF domain, and an HMG (high-mobility group) domain, respectively  
89 (Debuchy et al. 2010). Of these, the  $\alpha$  domain protein encoded by MAT1-1-1 is  
90 responsible for MAT identity and sexual development (Saupe et al. 1996). The PPF and  
91 HMG domain proteins appear to have interdependent roles in fertility as the deletion of  
92 one or the other has no apparent effect, while the deletion of both has been shown to  
93 decrease fertility (Ferreira et al. 1998).

94         For the MAT1-2 idiomorph, MAT1-2-1 encodes a protein with a HMG domain  
95 responsible for the establishment of MAT identity (Chang and Staben 1994; Coppin et  
96 al. 1997). MAT1-2-2 encodes a small open reading frame (ORF) that does not have an  
97 apparent function (Pöggeler and Kück 2000), but this ORF appears to be absent in  
98 some filamentous fungi (Debuchy and Coppin 1992). Both MAT proteins act as  
99 transcription factors and are required for the initiation and regulation of the sexual cycle.  
100 Self-fertile (homothallic) fungi contain both MAT genes critical for sexual development  
101 (MAT1-1-1 and MAT1-2-1) at the mating type locus. In this case, reliance on a  
102 complementary mating type to complete the sexual cycle is not required.

103         Both homothallism and heterothallism have been previously reported for *N.*  
104 *ditissima* (El-Gholl et al. 1986; Krüger 1973) while only heterothallism has been reported  
105 for *N. faginata* (Cotter and Blanchard 1978). However, these determinations relied

106 solely on culture-based observations via *in vitro* mating assays. No molecular  
107 characterization of the MAT locus has been completed for any member of *Neonectria*  
108 despite the publicly available genomes of several species in the genus (Salgado-  
109 Salazar and Crouch 2019; Gómez-Cortecero et al. 2015; Deng et al. 2015).

110         Confirming the thallism of the BBD pathogens is important for several reasons: 1)  
111 thallism is predicted to affect expected patterns of genomic diversity via obligate or  
112 facultative outcrossing (Glémin and Galtier 2012); and 2) relative rates of ascospore  
113 production among species linked to potential differences in thallism could influence  
114 patterns of dominance in the BBD pathosystem and/or the perception of dominance  
115 where species-level determination are primarily made using ascospores from field-  
116 collected perithecia. In addition, MAT genes have been demonstrated as highly useful  
117 for determining phylogenetic relationships among species within a genus or clade  
118 (Lopes et al. 2018; O'Donnell et al. 2004; Turgeon 1998).

119         Characterizing thallism can inform our understanding of disease cycle dynamics  
120 including propagule dissemination and mode of infection. One study investigating the  
121 production and dissemination of spores by *N. ditissima* infecting yellow birch (*Betula*  
122 *alleghaniensis* Britton) determined ascospores to be the dominant spore type in the  
123 environment throughout the year (Lortie and Kuntz 1963). Additionally, ascospores of a  
124 related species *Corinectria fuckeliana* (C. Booth) C. González & P. Chaverri (formerly  
125 *Neonectria fuckeliana*) have also been shown to be dominant relative to asexual conidia  
126 when infecting *Pinus radiata* D. Don in New Zealand (Crane et al. 2009). Together,  
127 these results indicate the progression of diseases caused by *Neonectria* and *Corinectria*  
128 fungi may depend on ascospore production and dissemination given the proposed

129 limited dissemination of asexual conidia by these fungi (Lortie and Kuntz 1963; Crane et  
130 al. 2009).

131 In addition to the potential importance of mating strategy on disease  
132 epidemiology, fungal population density assessments that depend on fruiting structure  
133 detection can be influenced by the relative rates of reproduction. Rates of visual  
134 detection are also likely influenced by fruiting structure type, where bright red perithecia  
135 are far easier to see and positively identify than the small, whitish conidiophores and  
136 sporodochia. Nearly all BBD studies that investigated interactions among these two  
137 *Neonectria* fungi have depended on the sampling and processing of perithecia to  
138 measure ascospores directly or culture the associated fungi for identification (Houston  
139 1994; Kasson and Livingston 2009). These studies have indicated *N. faginata*, over  
140 time, supplants *N. ditissima* as the dominant pathogen in the BBD pathosystem. As with  
141 differences in optimal abiotic conditions (temperature, relative humidity) or seasonality  
142 of fruiting, differences in thallism – if they exist – could likewise influence the frequency  
143 of perithecia production and therefore, detection rates. Thus, determining thallism for *N.*  
144 *ditissima*, *N. faginata* and *N. coccinea* could enhance our ability to interpret patterns of  
145 relative abundance in the BBD system.

146 The objectives of this study were as follows: 1) Determine thallism among  
147 members of *Neonectria* with emphasis on BBD-associated fungi: *N. ditissima*, *N.*  
148 *faginata*, and *N. coccinea*. This is important as studies to determine the mating  
149 strategies of *Neonectria* fungi are limited. Furthermore, genomic data for many  
150 *Neonectria* spp. are lacking, and therefore, more general primers would be useful to  
151 permit broader characterization of mating type genes across species. 2) Confirm



152 existing intra- and interspecies mating barriers using *in vitro* pairing assays. This is  
153 important as *N. ditissima* is reported from many plant hosts and the compatibility of  
154 strains from these various hosts remains unclear. Together, these results offer insight  
155 into mating regulation of *Neonectria* and allied fungi, thus providing an enhanced  
156 understanding of gene flow within and outside of the BBD system.

157

## 158 **Materials and Methods**

### 159 *Genome sequencing and identification of MAT loci*

160 Two genomes for *N. faginata* isolates (SK113 and MES1\_34.1.1) were produced  
161 in association with this work and allowed for MAT gene discovery (Table 1). Full  
162 genome details will be provided in a forthcoming publication (Morrison and Garnas  
163 unpublished). Genomic data for the two *N. faginata* isolates of putatively opposite  
164 mating types as determined using the *in vitro* pairing assay described below were  
165 generated by a combination of Oxford Nanopore Technologies (ONT) and Illumina  
166 HiSeq sequencing. Genomic DNA was extracted from a *N. faginata* MAT1-1 isolate  
167 using a CTAB-chloroform DNA extraction method (van Diepen et al. 2017) and a MAT1-  
168 2 isolate using a Wizard<sup>®</sup> kit (Promega, Madison, WI, USA) and suspended in 75 µl  
169 Tris-EDTA (TE) buffer (Amresco, Solon, OH, USA) with RNase treatment to remove co-  
170 extracted RNA. The MAT1-1 isolate was sequenced using a MinION sequencer (Oxford  
171 Nanopore Technologies MIN-101B) using the unmodified 1D factory protocol (SQK-  
172 LSK109 protocol version DE\_9062\_v109\_revD\_23May2018) and a MIN-106 flow cell  
173 (FLOW MIN-106 R9 version). Both MAT1-1 and MAT1-2 isolates were subjected to  
174 Illumina HiSeq 2 x 250 PE sequencing at the University of New Hampshire Hubbard

175 Center for Genome Studies. The ONT signal-level data was translated to FASTQ files  
176 using the Albacore v. 2.3.4 ONT proprietary basecaller resulting in >960,000 reads of  
177 which 50% were greater than 1 Kb. ONT reads were quality controlled and assembled  
178 using the Canu assembler v. 1.8 (Koren et al. 2017) with initial genome size estimate of  
179 45 Mb. Signal level ONT data was used to polish the assembly to correct major  
180 assembly errors using Nanopolish v. 0.10.2 (Loman et al. 2015). Illumina HiSeq data  
181 was trimmed for adapter sequences and quality filtered using BBDuk (BBMap v. 38.58;  
182 Bushnell B, sourceforge.net/projects/bbmap/) resulting in 2.5 million and 11.8 million  
183 high-quality paired-end sequence reads for the MAT1-1 and MAT1-2 isolates,  
184 respectively. The MAT1-1 isolate Illumina sequences were subsequently used to further  
185 polish the Canu assembly using Pilon v. 1.22 (Walker et al. 2014). The MAT1-2 isolate  
186 sequence reads were assembled using SPAdes 3.13.1 with default settings. The  
187 resulting assemblies were assessed for contiguity using QUAST (Gurevich et al. 2013)  
188 and were checked for universal single-copy ortholog content using BUSCO v. 3.0.0  
189 (Simão et al. 2015) with lineage Sordariomycetes. Assembly summary statistics are  
190 presented in Table S1, and complete code is available on request. Draft genome  
191 sequences are available on request.

192 Additionally, draft genomes of one European *N. ditissima* isolate (GenBank  
193 accession: LKCW01000000) (Gómez-Cortecero et al. 2015) and two New Zealand *N.*  
194 *ditissima* isolates (GenBank accessions: LDPK00000000; LDPL01000000) (Deng et al.  
195 2015) were used to identify putative *N. ditissima* MAT idiomorphs. An unpublished *N.*  
196 *coccinea* draft genome (GenBank accession WPDF00000000, Castlebury et al.  
197 unpublished) was also used in this study.

198 To locate MAT loci within these genomes, we used NCBI GenBank tBLASTn  
199 algorithms with predicted MAT amino acid sequences derived from available MAT1-1  
200 and MAT1-2 nucleotide sequences of two *Fusarium* (Nectriaceae) NCBI accessions:  
201 *Fusarium anguioides* (MH742713) and *Fusarium tucumaniae* (KF706656), respectively.  
202 Contigs containing sequences with an arbitrarily chosen similarity cutoff equal to or  
203 greater than 50% were selected for further examination.

204

#### 205 *Characterizing the structure of MAT loci*

206 Genomic data were used to create genetic maps of the MAT1-1 and MAT1-2 loci  
207 for *Neonectria ditissima* and *N. faginata* as well as the MAT1-2 locus for *N. coccinea*  
208 (Figure 1). AUGUSTUS 3.3.1 (Stanke et al. 2008) was used to predict potential gene  
209 coding regions and their resulting amino acid sequences within putative MAT loci as  
210 well as to search for conserved genes within flanking regions up to 15,000 bp upstream  
211 and downstream of the MAT idiomorphs. The selected reference genome for this  
212 prediction was *Fusarium graminearum*, which is embedded in the AUGUSTUS  
213 software. NCBI GenBank BLASTp search algorithms were used identify genes by  
214 comparing predicted amino acid sequences to the NCBI protein database.

215

#### 216 *Species-specific MAT 1-1-1 and MAT 1-2-1 primer design and PCR amplification*

217 Once we had identified the MAT locus in each genome, we designed forward and  
218 reverse MAT1-1-1 and MAT1-2-1 specific primers for rapid characterization of mating  
219 type for *N. ditissima* and *N. faginata* isolates (Table 2). Excluding the primer binding

220 sites, amplicon lengths were 710 bp (MAT1-1-1) and 591 bp (MAT1-2-1) for *N.*  
221 *ditissima*. Amplicon lengths for *N. faginata* were 527 bp (MAT1-1-1) and 612 bp (MAT1-  
222 2-1) (Table 2). Primers were manually designed in polymorphic regions distinct to each  
223 *Neonectria* species with limited repeats and approximately 60% G/C content. Primer  
224 dimer and hairpin formation among primer pairs was assessed using AutoDimer ([www-](http://www.s.nist.gov/dnaAnalysis)  
225 [s.nist.gov/dnaAnalysis](http://www.s.nist.gov/dnaAnalysis); Vallone and Butler, 2004). Melting temperatures were calculated  
226 using OligoAnalyzer Tool (Integrated DNA Technologies, Coralville, IA, USA) for  
227 standard Taq polymerase. PCR products were generated in 25 µl reactions containing  
228 12.5 µl Bioline PCR Master Mix (Bioline USA Inc, Taunton, MA), 10.0 µl MG H<sub>2</sub>O, 1.5 µl  
229 purified DNA, and 1.0 µl of both MAT1-1 or MAT1-2 primers (25 nM; Integrated DNA  
230 Technologies, Coralville, IA, USA). PCR conditions are outlined in Table 2 for each  
231 primer set.

232

### 233 *Genus-level MAT 1-1-1 and MAT 1-2-1 primer design and PCR amplification*

234 Genus-level primer pairs intended to amplify MAT1-1-1 (NeoM1f and NeoM1r)  
235 and MAT1-2-1 (NeoM2f and NeoM2r) for all included *Neonectria* species were designed  
236 as described above using available *Neonectria* genomic data (Table 2). Primer  
237 development for *Neonectria* spp. was completed using MAT1-1-1 and MAT1-2-1  
238 sequences derived from *N. ditissima*, *N. faginata*, *N. coccinea* (MAT1-2-1), *N. punicea*  
239 ([J.C. Schmidt] Castl. & Rossman) (MAT1-1-1; GenBank accession:  
240 QGQA00000000.1), and *N. hederæ* genomes ([C. Booth] Castl. & Rossman) (MAT1-2-  
241 1; GenBank accession: QGQB00000000.1). MAT1-1-1 and MAT1-2-1 nucleotide  
242 sequences were separately aligned using CLUSTAL-W (Larkin et al., 2007) within

243 MEGA v10.1.7 (Stecher et al. 2018), and primers were designed within conserved  
244 regions to potentially increase the utility of these primers for other *Neonectria* and allied  
245 fungi. MAT1-2-1 exhibited a higher level of polymorphism among the included  
246 *Neonectria* species and therefore, a second set of degenerate primers were designed to  
247 amplifying the MAT1-2-1 gene (Table 2; NeoM2Df and NeoM2Dr). All the sequences  
248 generated were deposited in GenBank (Table 1).

249

### 250 *Selection of Isolates*

251 Single ascospore-derived isolates of *N. ditissima* and *N. faginata* recovered from  
252 various geographic locations and host substrates (Table 1) were generated by  
253 squashing a single perithecium in 1ml of sterile water within a 1.5 ml Eppendorf tube,  
254 vortexing for 15 seconds to disperse ascospores, and spreading 100 µl onto a glucose-  
255 yeast extract (GYE) medium. Five germinating ascospores were transferred to a new  
256 GYE plate using a sterile needle after 24 hours and were allowed to grow for one week  
257 before replating. Each isolate was grown on GYE for two weeks and then identified  
258 using colony morphology based on type descriptions (Castlebury et al., 2006).

259 Genomic DNA was extracted from isolates or directly from perithecia as  
260 described above. For each species identified morphologically, three random isolate  
261 identifications were confirmed by sequencing the ribosomal internal transcribed spacer  
262 region (ITS) using primers ITS5 (5' – GGAAGTAAAAGTCGTAACAAGG – 3') and ITS4  
263 (5' – TCCTCCGCTTATTGATATGC – 3') (White et al., 1990). The PCR protocol was as  
264 follows: 95 °C for 2 min followed by 35 cycles of 95 °C for 30 sec, 56 °C for 30 sec, 72  
265 °C for 1 min with a final extension at 72 °C for 7 min. EF1- $\alpha$  sequencing was completed

266 using primers EF1728F (5' – CATCGAGAAGTTCGAGAAGG – 3') (Carbone and Kohn,  
267 1999) and EF1-1567R (5' – ACHGTRCCRATACCACCRATCTT – 3') (Rehner 2001)  
268 with the following PCR protocol: 95 °C for 2 min followed by 35 cycles of 95 °C for 30  
269 sec, 55 °C for 1 min, 72 °C for 1 min with a final extension at 72 °C for 7 min.

270 PCR products were visualized with gel electrophoresis by adding 4 µl SYBR gold  
271 (Invitrogen, Grand Island, NY, USA) and 4 µl loading dye (5Prime, Gaithersburg, MD) to  
272 products. Samples were then loaded into a 1.5%, wt/vol, agarose gel (Amresco, Solon,  
273 OH, USA) made with 0.5% Tris-borate-EDTA buffer (Amresco, Solon, OH, USA). To  
274 compare sizes, 100-bp and 1-kb molecular ladders (Omega Bio-tek, Norcross, GA,  
275 USA) were also added to gels. Electrophoresis was performed at 90V for 75 minutes.  
276 Bands were visualized on a UV transilluminator (Syngene, Frederick, MD, USA).

277 Positive reactions were purified using ExoSAP-IT (Affymetrix, Santa Clara, CA,  
278 USA) according to the manufacturer's recommendations. Purified PCR products were  
279 Sanger sequenced in forward and reverse directions using the same PCR primers  
280 (Eurofins, Huntsville, AL, USA). BLASTn searches were then used to identify species  
281 based on the best match in the NCBI database.

282

### 283 *Mating type gene screening*

284 All selected *N. ditissima* and *N. faginata* (22 and 18 isolates, respectively) were  
285 screened for the presence of MAT1-1-1 and/or MAT1-2-1 using species-specific and  
286 genus-level primer sets with the PCR protocols listed in Table 2. All PCR products were  
287 visualized, and a subset of positive reactions were sequenced as described for ITS and  
288 EF1- $\alpha$  amplicons.

289 To confirm the specificity of species-specific primer sets, mating type PCR  
290 reactions were performed using *N. ditissima* MAT primers for *N. faginata* isolates and  
291 vice versa. Additionally, a number of other members of the Nectriaceae were also  
292 tested using both *N. ditissima* and *N. faginata* MAT primers as described above. These  
293 included isolates of *N. coccinea*, *N. neomacrospora* ([C. Booth & Samuels] Mantiri &  
294 Samuels), *Fusarium concolor* (Reinking, 1934), *Nectria magnoliae* (M.L. Lohman &  
295 Hepting, 1943) and an additional unresolved species for which additional data is needed  
296 to confirm identity: *Corinectria* aff. *fuckeliana* (99.37% EF1- $\alpha$  sequence similarity to  
297 NCBI Genbank accession MK911707.1) (Table 1). Genus-level *Neonectria* MAT primer  
298 sets were similarly tested using representatives from all five Nectriaceae species tested  
299 in this study.

300 All resulting sequences were aligned as described above and compared to  
301 genome-derived MAT1-1-1 or MAT1-2-1 sequences to confirm their identity based on a  
302 sequence similarity. All sequences having greater than 70% sequence similarity were  
303 selected for further analysis. This threshold was determined by comparing MAT1-1-1  
304 and MAT1-2-1 genome-derived sequences from *N. ditissima* to the more distantly  
305 related *Fusarium anguioides* (MAT1-1-1; Genbank Accession: MH742713) and  
306 *Fusarium tucumaniae* (MAT1-2-1; Genbank Accession: KF706656) sequences.

307

### 308 *Phylogenetic analysis and protein alignment*

309 To examine evolutionary patterns and divergence in mating type genes, we  
310 constructed phylogenetic trees using the mating type gene sequence data produced in  
311 this study together with comparable sequences for other Nectriaceae available in NCBI

312 Genbank, including 11 strains representing 7 species (Table 1). All analyses were  
313 completed using MEGA v10.1.7 (Stecher et al. 2018). MAT nucleotide sequences were  
314 aligned using CLUSTAL-W (Larkin et al. 2007) and the best-fit nucleotide substitution  
315 model was chosen using Model Test AICc scores in MEGA v10.1.7. MAT1-1-1 and  
316 MAT1-2-1 maximum-likelihood trees were constructed independently using the Kimura  
317 2-parameter model with gamma distribution (K2+G) and 1000 bootstrap replicates. For  
318 both trees, MAT1-1-1 and MAT1-2-1 sequences from *Ophiocordyceps xeufengensis*  
319 and *Ustilaginoidea virens* served as outgroup taxa (Table 1).

320 We performed protein alignments to characterized divergence among species  
321 that could play a role in the maintenance of mating barriers. Protein sequences were  
322 predicted from one MAT1-1-1 and one MAT1-2-1 coding sequence from each species  
323 using ExpASy-Translate tool (<https://web.expasy.org/translate/>). Resulting protein  
324 sequences were aligned using CLUSTAL-W within MEGA v10.1.7. Boxshade Server  
325 v.3.21 ([https://embnet.vital-it.ch/software/BOX\\_form.html](https://embnet.vital-it.ch/software/BOX_form.html)) was used to visualize shared  
326 amino acids within each sequence.

327

### 328 *In vitro* mating assay

329 To demonstrate mating among MAT1-1 and MAT1-2 strains, an *in vitro* mating  
330 assay was performed with six MAT1-1-1 and six MAT1-2-1 isolates of both *N. faginata*  
331 and *N. ditissima*. These isolates varied in geographic origin and for *N. ditissima*, host  
332 substrate as to test compatibility among representatives from allopatric populations and  
333 potentially host-specific *N. ditissima* isolates. This pairing assay did not include *N.*  
334 *coccinea* as only genomic DNA was available. Selected isolates were grown on



335 glucose-yeast extract agar for two weeks. Each selected isolate was then paired three  
336 times with itself, with an isolate of the same mating type, and with two isolates of the  
337 opposite mating type for a total of twelve pairings per isolate. For each pairing, a 5x5-  
338 mm fungus-colonized agar plug from each isolate was placed on opposite sides of a  
339 sterile, flat toothpick placed atop the media along the center point of the petri dish  
340 (Figure 2A). All plates were parafilm and placed at 20 °C with a 16 h/8 h light/dark  
341 cycle under cool fluorescent lamps. Plates were checked weekly for perithecia formation  
342 for up to 12 weeks (Figure 2B).

343 As perithecia were produced, squash mounts were used to check for ascospores  
344 using light microscopy (Figure 2C). Additionally, ascospores were checked for viability  
345 by removing a single perithecium, macerating in 1 ml of sterile dH<sub>2</sub>O, spreading 300 µl  
346 of the spore suspension on GYE, and observing growth. For one progeny plate from  
347 each paired isolate set, ten germinating ascospores were sub-cultured onto a new GYE  
348 plate after 24 hours and allowed to grow for one week. Genomic DNA was extracted  
349 from the ten subcultured progeny and screened for MAT genes as described above.  
350 Given that progeny should segregate 1:1 for MAT1-1 and MAT1-2, all ascospore  
351 suspension plates were incubated for up to 12 weeks to observe mating among the  
352 progeny.

353 A subsequent interspecies mating assay was performed to test mating capability  
354 among *N. ditissima*, *N. faginata*, and other Nectriaceous fungi. Here, MAT1-1- and  
355 MAT1-2-positive isolates of *Neonectria ditissima* (MAT1-1: NdBI001; MAT1-2:  
356 NdSam003) and *N. faginata* (MAT1-1: NfFg005; MAT1-2: NfFg008) were paired three  
357 times each with an isolate of *Nectria magnoliae* (isolate no. NecmLt005) and *Corinectria*

358 aff. *fuckeliana* (isolate no. CafPr004) as described above. Additionally, both *Neonectria*  
359 *ditissima* isolates were paired three times with the *N. faginata* isolate of the opposite  
360 mating type. Plates were weekly checked for perithecia formation for up to 12 weeks  
361 and processed as described above.

## 362 **Results**

### 363 *Identification and structure of MAT loci in N. ditissima and N. faginata*

364 Each of the *N. faginata* and *N. ditissima* genomes contained either the MAT1-1  
365 or MAT 1-2 idiomorph, and the single *N. coccinea* genome contained only a MAT1-2  
366 idiomorph. MAT genes of the opposite mating type were not found within the genomes.  
367 AUGUSTUS analyses of the MAT loci and flanking genes revealed a similar genetic  
368 structure for *N. coccinea*, *N. ditissima* and *N. faginata* with only minor differences in the  
369 MAT gene open reading frame (ORF) and intron lengths (Figure 1). The MAT1-1-1 ORF  
370 for *N. ditissima* was 1,167 bp (357 amino acids [aa]; GenBank accession XXXXX) with  
371 two introns of 48 bp and 46 bp, while the MAT1-1-1 ORF for *N. faginata* was 1204 bp  
372 (371 aa; GenBank accession XXXXX) with two introns of 46 bp and 44 bp. The MAT1-  
373 2-1 ORF for *N. ditissima* was 827 bp (243 aa; GenBank accession XXXXX) with two  
374 introns of 48 bp and 49 bp, while the ORF for *N. faginata* was 815 bp (239 aa; GenBank  
375 accession XXXXX) with two introns of 47 bp and 50 bp. Additionally, the genetic  
376 structure of MAT1-2-1 of *N. coccinea* was found to be similar to *N. ditissima* and *N.*  
377 *faginata* with an ORF of 816 (238 aa; GenBank accession XXXXX) with two introns of  
378 50 bp and 48 bp.

379 Two commonly co-occurring MAT associated genes were found near MAT1-1-1  
380 in both *N. ditissima* and *N. faginata*, including MAT1-1-2 and MAT1-1-3 (Figure 1;

381 Coppin et al. 1997). For each of the three *Neonectria* spp., evidence of co-occurrence of  
382 MAT1-2-1 and MAT1-2-2 was not found. Both *N. ditissima* and *N. faginata* MAT loci  
383 were flanked by the conserved SLA2 gene previously described as being associated  
384 with MAT loci (Debuchy and Turgeon 2006). SLA2 was found to occur in a separate  
385 contig of the *N. coccinea* de novo genome assembly, and although present, could not  
386 be shown to be part of the MAT locus without further assembly. APN2 is a second  
387 conserved gene often flanking the MAT loci of other Ascomycetes (Debuchy and  
388 Turgeon 2006), but this gene was not identified in the regions flanking the MAT loci  
389 using the de novo genome assemblies analyzed in this study.

390

#### 391 *Species specific MAT1-1-1 and MAT1-2-1 primers*

392 *Neonectria ditissima* (NdM1f/r) and *N. faginata* (NdM2f/r) MAT primer pairs  
393 amplified a single product of the expected size for their target species (Table 2).  
394 Sequencing confirmed the identity of all PCR products which exhibited 99% or greater  
395 sequence identity with the target MAT sequences. All of the 160 (40 initially screened or  
396 120 progenies from *in vitro* crosses) single-spore derived isolates tested yielded either  
397 MAT1-1-1 or MAT1-2-1 amplicons while DNA extractions from perithecia (N = 7)  
398 containing ascospores of both mating types yielded both MAT products. Species-  
399 specific primers designed for *N. faginata* did not amplify either MAT gene in *N.*  
400 *ditissima*. Likewise, *N. ditissima*-specific primers did not amplify either MAT gene in *N.*  
401 *faginata*.

402 MAT1-1-1 and MAT1-2-1 primer pairs designed for *N. ditissima* did not amplify  
403 DNA in any of the other tested species (Table 3). In contrast, the *N. faginata* MAT1-1-1

404 primer pair amplified MAT1-1-1 in MAT1-1 isolates of *N. coccinea*, *N. neomacrospora*,  
405 and *Nectria magnoliae*. In contrast, MAT1-2-1 primers for *N. faginata* did not amplify  
406 MAT1-2-1 for any other tested species.

407         Amplification of non-mating type associated proteins was observed when  
408 applying *N. faginata* MAT1-1-1 primers to MAT1-2 strains of *N. coccinea*, *Corinectria*  
409 *aff. fuckeliana*, and *N. neomacrospora*. Sequencing of these amplicons confirmed a  
410 putative MFS-type transporter protein (~120 bp > target) in *N. coccinea* and two  
411 undescribed hypothetical proteins in *N. neomacrospora* (~470 bp > target) and *C. aff.*  
412 *fuckeliana* (~470 bp > target) (Table S2). Additionally, amplification of non-mating type  
413 associated proteins was observed when *N. faginata* MAT1-2-1 primers were applied to  
414 MAT1-1 *N. coccinea* and *C. aff. fuckeliana* isolates including hypothetical proteins in *N.*  
415 *coccinea* (~540 bp > target) and *C. aff. fuckeliana* (~190 bp > target) (Table S2).

416

#### 417 *Genus-level Neonectria MAT1-1-1 and MAT1-2-1 primers*

418         Genus-level MAT primer pairs (NeoM1f/r and NeoM2f/r) successfully amplified  
419 both MAT1-1-1 and MAT1-2-1 gene for *N. ditissima* and *N. faginata* (Supplemental  
420 Figure 1). These same primers also amplified MAT1-1-1 for *Corinectria aff. fuckeliana*  
421 (Table 3) but failed to amplify MAT1-1-1 and MAT1-2-1 for all other non-target fungi.

422         The MAT1-2-1 degenerate primer pair (NeoM1df/r) successfully amplified MAT1-  
423 2-1 for all species tested, including a more distantly related *Fusarium concolor* isolate.  
424 Non-target amplification of a hypothetical protein (~590 bp > target) was observed when

425 the NeoM2f/r primer pair was applied to MAT1-1 *N. coccinea* and both MAT1-1 and  
426 MAT1-2 *N. neomacrospora* isolates.

427

#### 428 *Phylogenetic analyses and protein alignments*

429 Phylogenetic analyses of MAT1-1-1 and MAT1-2-1 sequences resulted in similar  
430 tree topologies (Figures 3 and 4). Analysis of MAT1-1-1 grouped all *Neonectria* species  
431 into a strongly supported monophyletic clade sister to *Corinectria* (formerly *Neonectria*)  
432 (González and Chaverri 2017) (Figure 3). Within *Neonectria*, a clade containing *N.*  
433 *coccinea*, *N. faginata* and *N. punicea* was resolved as sister to *Nectria magnoliae* from  
434 *Liriodendron tulipifera* and *Magnolia fraseri*. For MAT1-2-1, all included *Neonectria*  
435 species resolved to a monophyletic clade that was sister to a clade containing  
436 *Corinectria* aff. *fuckeliana* and the three species of *Fusarium* (Figure 4). Additionally,  
437 two sister clades within *Neonectria* were resolved: 1) *N. faginata* was sister to a clade  
438 containing *N. coccinea* and *Nectria magnoliae*, and 2) *Neonectria ditissima* and *N.*  
439 *neomacrospora* formed a monophyletic clade sister to *N. hederæ*. All isolates of *N.*  
440 *ditissima* formed a single lineage regardless of plant host for both MAT1-1-1 and MAT1-  
441 2-1.

442 Protein alignments included approximately 100 amino acids for MAT1-1-1  
443 sequences and approximately 75 amino acids for MAT1-2-1 sequences within the  
444 conserved region of these genes (Figure 5). *Neonectria coccinea*, *Nectria magnoliae*,  
445 *Corinectria* aff. *fuckeliana*, and *Fusarium concolor* were missing the first five MAT1-2-1  
446 amino acids, and therefore, results reported for MAT1-2-1 below represent values with  
447 (full) and without (partial) the first five amino acids. Protein alignments for both MAT1-1-

448 1 and MAT1-2-1 were most similar among *Neonectria* spp. with 28% and 29.3% (or  
449 36% for full sequence comparisons) of amino acids conserved across all species  
450 considered, respectively. Of these shared amino acids, 19% MAT1-1-1 and 25.3%  
451 MAT1-2-1 amino acids (partial seqs) were shared with included *Corinectria* spp. Across  
452 all included fungi, only 5% of amino acids were shared among MAT1-1-1 sequences  
453 and 21.3% (or 28% for full sequence comparisons) amino acids were shared among  
454 MAT1-2-1 sequences.

455

#### 456 *In vitro* pairing assay results

457 For *N. faginata* and *N. ditissima* intraspecies pairings, perithecia with viable  
458 ascospores were produced for all pairings between MAT1-1 and MAT1-2 strains with  
459 one exception: one pairing between isolates NfFg006 and NfFg012 failed to produce  
460 perithecia within the 12-week assay (Table 4). All ascospore suspension plates  
461 containing ascospore progeny from single, squashed perithecia resulting from MAT1-1 x  
462 MAT1-2 pairings also yielded perithecia. No pairings with an isolate of the same mating  
463 type, including self-pairings, yielded perithecia. Additionally, no evidence of mating was  
464 observed in interspecies pairings.

465 Each progeny included in the subsequent PCR screening resulted in the  
466 amplification of a single MAT gene. Both MAT genes were found to be segregated  
467 among progeny at a ratio not significantly divergent from the expected 1:1 for *N.*  
468 *ditissima* ( $\chi^2 = 0.07$ ,  $df = 1,60$ ;  $P = 0.80$ ) and *N. faginata* ( $\chi^2 = 0.27$ ,  $df = 1,60$ ;  $P = 0.606$ )  
469 progeny (Table 4).

470

## 471 **Discussion**

472 Beech bark disease was first reported in Halifax, Nova Scotia, Canada around  
473 1890 and continues to spread throughout the range of American beech (Hewitt 1914;  
474 Erhlich 1934). Likewise, BBD continues to impact European Beech throughout Europe  
475 (Cicák et al. 2006; Cicák and Mihál 2008). Despite the ecological importance of this  
476 disease (Houston 1994b; Garnas et al. 2011a,b), certain aspects of BBD biology and  
477 epidemiology remain largely unexplored, including the mating strategies of *N. ditissima*,  
478 *N. faginata*, and *N. coccinea*. Previous studies regarding the thallism of *N. ditissima* and  
479 *N. faginata* (El-Gholl et al. 1986; Krüger 1973; Cotter and Blanchard 1978) were either  
480 inconclusive or sample limited, and as such, the role of mating strategy in the BBD  
481 pathosystem in the U.S. has historically been uncertain. Thallism is particularly  
482 important to the BBD pathosystem given that at least two dominant, sexually  
483 reproducing pathogens are causal agents of the disease in both the U.S. and Europe.  
484 Both can colonize single trees and, in some instances, have been found to co-occur  
485 within the same 2.5" diameter bark disk (Kasson and Livingston 2009).

486 *Neonectria faginata* has been previously reported as the dominant pathogen in  
487 the BBD system in North America (Houston 1994; Kasson and Livingston 2009). Mating  
488 strategy may have provided one explanation for its dominance, but as shown in this  
489 study, both *N. faginata* and *N. ditissima* are heterothallic fungi based on limited  
490 sampling. Therefore, the possibility of any advantage that homothallism might confer is  
491 eliminated, indicating that *N. faginata* is likely dominant due to an increased level of  
492 virulence, other advantageous traits, or some combination of these factors.

493           Despite having resolved the mating strategy of these fungi, the potential  
494 overrepresentation of either *N. ditissima* or *N. faginata* in previous studies may be due  
495 to perithecia-dependent sampling bias. For example, environmental conditions (e.g. RH,  
496 temperature) and time required for perithecia production may significantly differ between  
497 these two fungi. Given potential seasonal differences in fruiting, sampling at a single  
498 time point in the year could potentially yield a community not representative of the  
499 relative abundance of the *Neonectria* spp. present. Additionally, casual observations of  
500 *N. ditissima* on non-beech hosts can reveal very limited to no perithecia occurring at a  
501 given infection site. This may be in part due to host susceptibility, resulting in more or  
502 less necrotic tissue, which is generally considered favorable for perithecia production by  
503 necrotrophic fungi.

504           Host specificity may develop through the evolution of mating barriers among  
505 strains of a single species occurring on differing hosts. Results from this study have  
506 demonstrated a lack of reproductive barriers among *N. ditissima* strains from several  
507 plant hosts. All pairings of either MAT1-1-1 or MAT1-2-1 strains from different plant  
508 hosts resulted in perithecia formation. While a lack of host specificity by *N. ditissima* has  
509 been previously demonstrated using pathogenicity assays (Lortie 1969; Ng and Roberts  
510 1974; Barnard et al. 1988; Plante and Bernier 1997), mating among *N. ditissima* strains  
511 infecting co-occurring tree species had not been previously tested until now. Given the  
512 lack of reproductive barriers, evolution of host specificity is limited by obligate  
513 outcrossing among these co-occurring strains.

514           The phylogenetic analyses using MAT gene sequences were found to be in  
515 agreement with previously resolved relationships demonstrated using EF1- $\alpha$ , RPB2, and



516  $\beta$ -tubulin (Castlebury et al. 2006). This finding confirms the utility of MAT genes in  
517 resolving relationships among *Neonectria* and allied fungi. Additionally, *N. ditissima*  
518 isolates from different plant hosts included in the phylogeny form a single lineage  
519 providing additional evidence for the lack of reproductive barriers, limiting the possibility  
520 the development of host specificity within *N. ditissima* populations co-occurring across  
521 multiple hosts. The amino acid alignments visualized protein sequence divergence  
522 potentially contributing to mating barriers among these closely related species that were  
523 confirmed by inter-species mating assays. Using such methods to test intraspecies MAT  
524 gene diversity among these and closely allied fungi may prove valuable for broader  
525 surveys.

526         Limited amplification of non-mating type proteins was observed among several  
527 MAT primer – species combinations for isolates of the opposite mating type. However,  
528 in all cases, the sequences were found to be larger than the expected product size.  
529 Given that such issues can lead to erroneous conclusions, electrophoresis gels should  
530 be run to 100 bp resolution and additionally, PCR conditions should be optimized for the  
531 target species.

### 532 *Conclusion*

533         In this study, we confirm heterothallism and characterized the MAT idiomorphs of  
534 *N. ditissima*, *N. faginata*, *N. coccinea* and several other members of Nectriaceae. These  
535 findings provide additional insight into characteristics that may shape the community  
536 and population dynamics of the beech bark disease complex and its causal agents.  
537 Additional studies are needed to further understand the fungal dynamics of *N. ditissima*,  
538 *N. faginata*, and *N. coccinea* in their respective BBD systems. These efforts include: 1)

539 identifying differing environmental factors required for perithecia production among  
540 *Neonectria* spp.; 2) characterizing variability in sexual reproduction by *N. ditissima*  
541 across host substrates; 3) assessing the potential for interspecific hybridization between  
542 closely related *Neonectria* spp. found co-occurring on beech and other hosts but  
543 excluded from this study; and 4) comprehensive screening of additional isolates from  
544 populations not sampled in this study to assess intraspecies MAT gene diversity and  
545 uncover possible intraspecies mating barriers.

546

#### 547 **Acknowledgements**

548 The authors thank Nicole Utano, Braley Burke and Amy Metheny for their assistance  
549 with field collections and sample processing. C.M.S was supported, in part, by the WVU  
550 Outstanding Merit Fellowships for Continuing Doctoral Students. M.T.K. by funds from  
551 West Virginia Agricultural and Forestry Experiment Station. Work by J.R.G. and E.W.M  
552 was supported by the USDA National Institute of Food and Agriculture McIntire-Stennis  
553 Project (Accession No. 1012453). Partial funding was provided by the New Hampshire  
554 Agricultural Experiment Station. This is Scientific Contribution Number \_\_\_\_\_. The  
555 mention of firm names or trade products does not imply that they are endorsed or  
556 recommended by the US Department of Agriculture over other firms or similar products  
557 not mentioned. The USDA is an equal opportunity provider and employer.

558

559 **Literature Cited**

- 560 Alexopolous CJ, Mims CW, Blackwell M. 1996. Introductory Mycology, 4<sup>th</sup> ed.  
561 John Wiley & Sons, Inc, New York.
- 562 Barnard EL, El-Gholl NE, Gilly SP. 1988. Comparative spore morphology and  
563 pathogenicity of four Florida isolates of *Nectria galligena*. Plant Disease 72:973-  
564 976.
- 565 Booth C. 1967. *Nectria galligena*. CMI Descriptions of Pathogenic Fungi and Bacteria  
566 147:1-2.
- 567 Cale JA, Garrison-Johnston MT, Teale SA, Castello JD. 2017. Beech bark disease in  
568 North America: Over a century of research revisited. Forest Ecology and  
569 Management 394: 86-103.
- 570 Carbone I, Kohn LM. 1999. A method for designing primer sets for speciation studies  
571 in filamentous fungi. Mycologia 91: 553-556.
- 572 Castlebury LA, Rossman AY, Hyten AS. 2006. Phylogenetic relationships of  
573 *Neonectria/Cylindrocarpon* on *Fagus* in North America. Canadian Journal of  
574 Botany 84: 1417-1433.
- 575 Chang S, Staben C. 1994. Directed replacement of mt A by mt a-1 effects a mating type  
576 switch in *Neurospora crassa*. Genetics 138:75–81
- 577 Chapela IH, Boddy L. 1988. Fungal colonization of attached beech branches. II. Spatial

- 578 and temporal organization of communities arising from latent invaders in bark  
579 and functional sapwood, under different moisture regimes. *New Phytologist*  
580 110:47-57.
- 581 Cicák A, Mihál I. 2008. Current state of beech bark necrotic disease in Southern  
582 Poland. *Journal of Forest Science* 54:459-464.
- 583 Cicák A, Mihál I, Tsakov H, Petkov P. 2006. Actual status of the beech bark necrotic  
584 disease in North Western Bulgaria. *Journal of Forest Science* 52:226-232.
- 585 Cotter HVT, Blanchard RO. 1978. Heterothallism in *Nectria coccinea* var. *faginata*.  
586 *Mycologia* 70:697-700.
- 587 Coppin E, Debuchy R, Arnaise S, Picard M. 1997. Mating types and sexual  
588 development in filamentous ascomycetes. *Microbiology and Molecular Biology*  
589 *Reviews* 61:411-428.
- 590 Crane PE, Hopkins AJM, Dick MA, Bulman, LS. 2009. Behavior of *Neonectria*  
591 *fuckeliana* causing a pine canker disease in New Zealand. *Canadian Journal of*  
592 *Forest Research* 39:2119-2128.
- 593 Debuchy R, Coppin E. 1992. The mating types of *Podospora anserina*: functional  
594 analysis and sequence of the fertilization domains. *Molecular and General*  
595 *Genetics* 233:113–121.
- 596 Debuchy R, Turgeon BG. 2006. Mating-type structure, evolution, and function in  
597 Euascomycetes. *The Mycota I: Growth, Differentiation and Sexuality*, Springer-  
598 Verlag, Berlin. 293-323.
- 599 Debuchy R, Berteaux-Lecellier V, Silar P. 2010. Mating systems and sexual

- 600 morphogenesis in ascomycetes. In Cellular and molecular biology of filamentous  
601 fungi. American Society of Microbiology. 501-535.
- 602 Deng CH, Scheper RW, Thrimawithana AH, Bowen JK. 2015. Draft genome sequences  
603 of two isolates of the plant-pathogenic fungus *Neonectria ditissima* that differ in  
604 virulence. Genome Announcements 3.
- 605 Dukes JS, Pontius J, Orwig DA, Garnas JR, Rodgers VL, Brazee N, Cooke B,  
606 Theoharides KA, Stange EE, Harrington R, Ehrenfeld J, Gurevitch J, Lerdau M,  
607 Stinson K, Wick R, Ayres M. 2009. Responses of insect pests, pathogens, and  
608 invasive plant species to climate change in the forests of northeastern North  
609 America: what can we predict? Canadian Journal of Forest Research 39:231–  
610 248.
- 611 Ehrlich, J. 1934. The beech bark disease, a *Nectria* disease of *Fagus*, following  
612 *Cryptococcus fagi* (Baer.). Canadian Journal of Research 10: 593-692.
- 613 El-Gholl NE, Barnard EL, Schroeder RA. 1986. Homothallism in *Nectria galligena*.  
614 Canadian Journal of Botany. 64: 902-903.
- 615 Ferreira AV, An Z, Metzenberg RL, Glass NL. 1998. Characterization of mat A-2, mat A-  
616 3 and deltamata mating-type mutants of *Neurospora crassa*. Genetics 148:1069–  
617 1079.
- 618 Garnas JR, Houston DR, Ayres MP, Evans C. 2011. Disease ontogeny overshadows  
619 effects of climate and species interactions on population dynamics in a nonnative  
620 forest disease complex. Ecography 35:412-421.
- 621 Garnas JR, Ayres MP, Liebhold AM, Evans C. 2011. Subcontinental impacts of an

- 622           invasive tree disease on forest structure and dynamics. *Journal of Ecology*  
623           99:532-541.
- 624 Glémin S, Galtier N. 2012. Genome evolution in outcrossing versus selfing versus  
625           asexual species. *Methods in Molecular Biology* 855:311–335.
- 626 Gómez-Cortecero A, Harrison RJ, Armitage AD. 2015. Draft genome sequence of a  
627           European isolate of the apple canker pathogen *Neonectria ditissima*. *Genome*  
628           Announcements 3.
- 629 González CD, Chaverri P. 2017. *Corinectria*, a new genus to accommodate  
630           *Neonectria fuckeliana* and *C. constricta* sp. nov. from *Pinus radiata* in Chile.  
631           *Mycological Progress* 16:1015–1027.
- 632 Gurevich A, Saveliev V, Vyahhi N, Tesler G. 2013. QUASt: quality assessment tool for  
633           genome assemblies. *Bioinformatics* 29:1072–1075.
- 634 Hendry SJ, Boddy L, Lonsdale D. 2002. Abiotic variable effect differential expression of  
635           latent infections in beech (*Fagus sylvatica*). *New Phytologist* 155:449-460.
- 636 Hewitt CG. 1914. Note on the occurrence of the felted beech coccus *Cryptococcus*  
637           *fagi* (Baerens) Dougl. in Nova Scotia. *The Canadian Entomologist* 46:15-16.
- 638 Houston DR, Mahoney EM, McGauley BH. 1987. Beech bark disease: association  
639           of *Nectria ochroleuca* in W.VA., PA, and Ontario. *Phytopathology* 77:1615.
- 640 Houston DR. 1994a. Temporal and spatial shift within the *Nectria* pathogen complex  
641           associated with beech bark disease of *Fagus grandifolia*. *Canadian Journal of*  
642           *Forest Research* 24:960-968.
- 643 Houston DR. 1994b. Major new tree disease epidemics: beech bark disease. *Annual*  
644           *Review of Phytopathology* 32:75-87.

- 645 Kasson MT, Livingston WH. 2009. Spatial distribution of *Neonectria* species  
646 associated with beech bark disease in northern Maine. *Mycologia* 101:190-195.
- 647 Kasson MT, Livingston WH. 2012. Relationships among beech bark disease,  
648 climate, radial growth response and mortality of American beech in northern  
649 Maine, USA. *Forest Pathology*. 42:199-212.
- 650 Koren S, Walenz BP, Berlin K, Miller JR, Bergman NH, Phillippy AM. 2017. Canu:  
651 scalable and accurate long-read assembly via adaptive k-mer weighting and  
652 repeat separation. *Genome Research* 27:722–736.
- 653 Kronstad JW, Staben C. 1997. Mating type in filamentous fungi. *Annual Review of*  
654 *Genetics* 31:245–276.
- 655 Krüger J. 1973. Zur genetik von *Nectria galligena* Bres. *Journal of Phytopathology* 79:  
656 320-342.
- 657 Larkin MA, Blackshields G, Brown NP, Chenna R, McGettigan PA, McWilliam H,  
658 Valentin F, Wallace IM, Wilm A, Lopez R, Thompson JD, Gibson TJ, Higgins DG.  
659 2007. Clustal W and Clustal X version 2.0. *Bioinformatics* 23:2947-2948.
- 660 Lohman ML, Watson AJ. 1943. Identity and host relations of *Nectria* species  
661 associated with diseases of hardwoods in the Eastern States. *Lloydia* 6: 77-108.
- 662 Loman NJ, Quick J, Simpson JT. 2015. A complete bacterial genome assembled  
663 de novo using only nanopore sequencing data. *Nature Methods* 12:733–735.
- 664 Lopes A, Linaldeddu BT, Phillips AJ, Alves A. 2018. Mating type gene analyses in the  
665 genus *Diplodia*: From cryptic sex to cryptic species. *Fungal Biology* 122: 629-  
666 638.
- 667 Lortie M, Kuntz JE. 1963. Ascospore discharge and conidium release by *Nectria*

- 668           *galligena* Bres. under field and laboratory conditions. Canadian Journal of Botany  
669           41:1203-1210.
- 670 Lortie M. 1969. Inoculation of *Nectria galligena* on northern hardwoods. Laval University  
671           Forest Research Foundation 13:1-29.
- 672 McCullough D, Wieferich J. 2015. Beech bark disease in Michigan: spread of the  
673           advancing front and stand-level impacts. Forest Health Monitoring: National  
674           Status, Trends, and Analysis 2014, USDA Forest Service, Southern Research  
675           Station, Asheville, NC. 125- 132.
- 676 McLaughlin J, Greifenhagen S. 2012. Beech bark disease in Ontario: a primer and  
677           management recommendations. Forest Research Note – Ontario Forest  
678           Research Institute, Sault Ste Marie, Ontario, Canada.
- 679 Ng KW, Roberts ET. 1974. Pathogenicity of *Nectria galligena*. Plant Pathology 23:  
680           49-50.
- 681 Plante F, Bernier L. 1997. Variability of virulence of *Nectria galligena* towards northern  
682           hardwoods. European Journal of Plant Pathology 27:261-272.
- 683 Pöggeler S, Kück U. 2000. Comparative analysis of the mating-type loci from  
684           *Neurospora crassa* and *Sordaria macrospora*: identification of novel transcribed  
685           ORFs. Molecular and General Genetics 263:292–301.
- 686 Rehner S. 2001. Primers for Elongation Factor 1- $\alpha$  (EF1- $\alpha$ ). Insect Biocontrol  
687           Laboratory: USDA, ARS, PSI.
- 688 Salgado-Salazar C, Crouch JA. 2019. Genome resources for the stem and bark  
689           canker pathogens *Corinectria fuckeliana*, *Neonectria hederæ*, and *N. punicea*.  
690           Plant Disease 103: 389-391.



- 691 Saupe S, Stenberg L, Shiu KT, Griffiths AJ, Glass NL. 1996. The molecular nature of  
692 mutations in the mt A-1 gene of the *Neurospora crassa* A idiomorph and their  
693 relation to mating-type function. *Molecular and General Genetics* 250:115–22
- 694 Simão FA, Waterhouse RM, Ioannidis P, Kriventseva EV, Zdobnov EM. 2015.  
695 BUSCO: assessing genome assembly and annotation completeness with single-  
696 copy orthologs. *Bioinformatics* 31:3210–3212.
- 697 Spaulding P, Grant TJ, Ayers TT. 1936. Investigations of *Nectria* diseases in hardwoods  
698 of New England. *Journal of Forestry* 34:169-179.
- 699 Stanke M, Diekhans M, Baertsch R, Haussler D. 2008. Using native and syntenically  
700 mapped cDNA alignments to improve de novo gene finding. *Bioinformatics*  
701 24:637-644.
- 702 Stecher G, Tamura K, Kumar S. 2020. Molecular Evolutionary Genetics Analysis  
703 (MEGA) for macOS. *Molecular Biology and Evolution*.
- 704 Thomsen M, Buchwald NF, Hauberg, P. 1949. Angreb af *Cryptococcus fagi*, *Nectria*  
705 *galligena* og andre parasiter paa bog i Danmark 1939–43. *Det Forstlige*  
706 *Forsogsvaesen*, 18: 97–326.
- 707 Turgeon BG. 1998. Application of mating type gene technology to problems in fungal  
708 biology. *Annual Review of Phytopathology* 36:115-137.
- 709 Vallone P, Butler J. 2004. AutoDimer: A screening tool for primer-dimer and hairpin  
710 structures. *BioTechniques* 37:226-231.
- 711 van Diepen LT, Frey SD, Landis EA, Morrison EW, Pringle, A. 2017. Fungi exposed to  
712 chronic nitrogen enrichment are less able to decay leaf litter. *Ecology*. 98: 5-11.
- 713 Walker BJ, Abeel T, Shea T, Priest M, Abouelliel A, Sakthikumar S, Cuomo CA, Zeng

714 Q, Wortman, J., Young, S.K., Earl, A.M., 2014. Pilon: an integrated tool for  
715 comprehensive microbial variant detection and genome assembly improvement.  
716 PLOS ONE 9.

717 White TJ, Bruns T, Lee S, Taylor J. 1990. Amplification and direct sequencing of  
718 fungal ribosomal RNA genes for phylogenetics. PCR Protocols-A Guide to  
719 Methods and Applications 18:315-322.

720 Yun SH, Arie T, Kaneko I, Yoder OC, Turgeon BG. 2000. Molecular organization of  
721 mating type loci in heterothallic, homothallic, and asexual *Gibberella/Fusarium*  
722 species. Fungal Genetics and Biology 31:7-20.

723

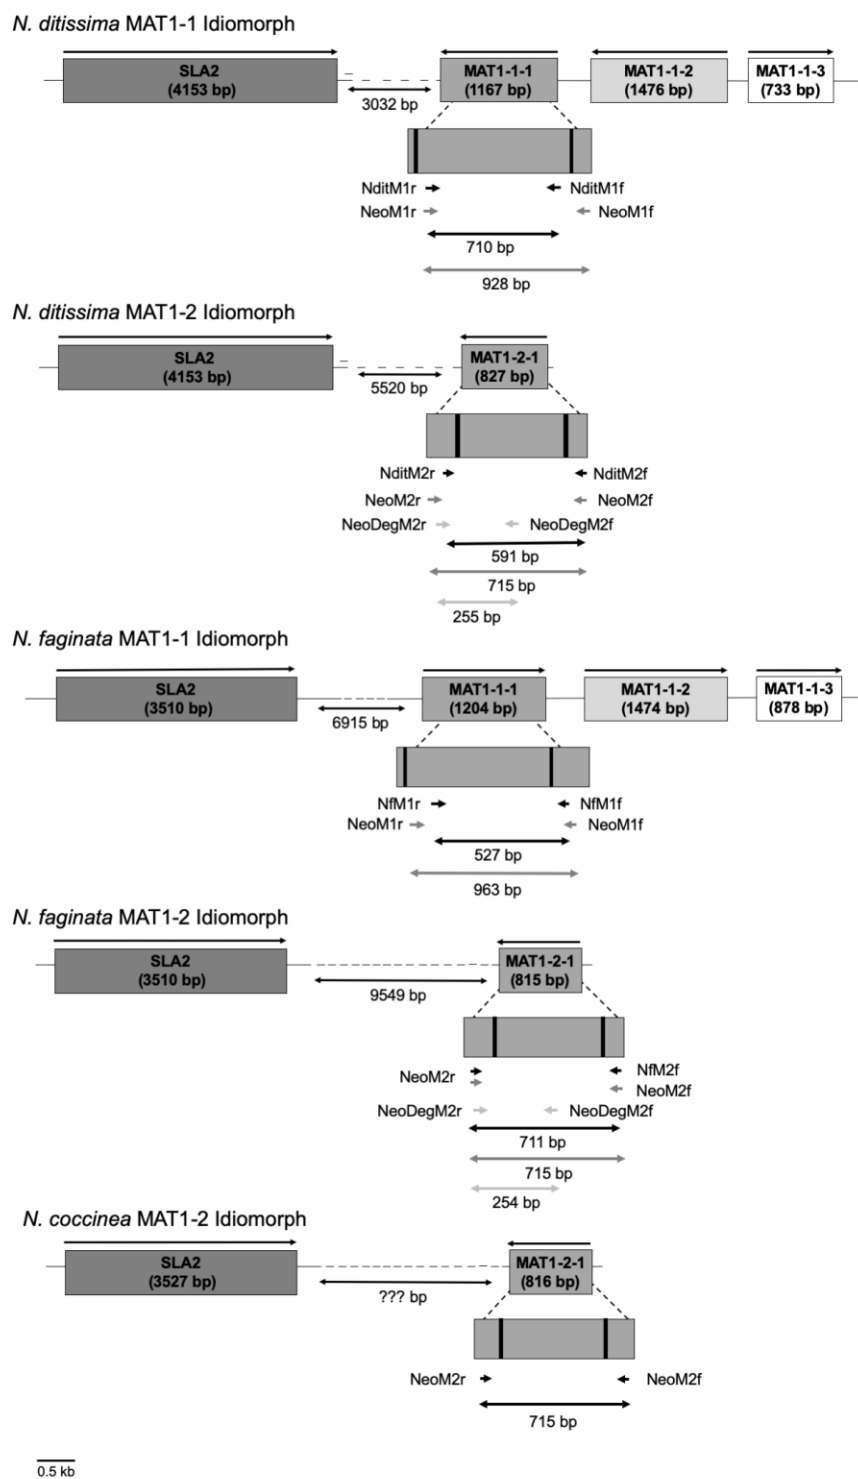

724

725 Figure 1: Structure of the MAT1-1 and MAT1-2 loci of the heterothallic fungi: *Neonectria*

726 *ditissima*, *Neonectria faginata*, and *N. coccinea* (MAT1-2 only). Arrows above the genes

727 indicate the 5' – 3' orientation. Coding sequence lengths are included below each gene  
728 identifier. For MAT1-1-1 and MAT1-2-1 genes, introns are represented by vertical black  
729 lines, and approximate primer binding locations are illustrated for each primer pair  
730 below the gene illustration. The approximate amplicon size for each primer pair is  
731 shown below the primer binding locations and is shaded based on each primer pair. All  
732 distances and sizes are estimations and not drawn to scale.  
733

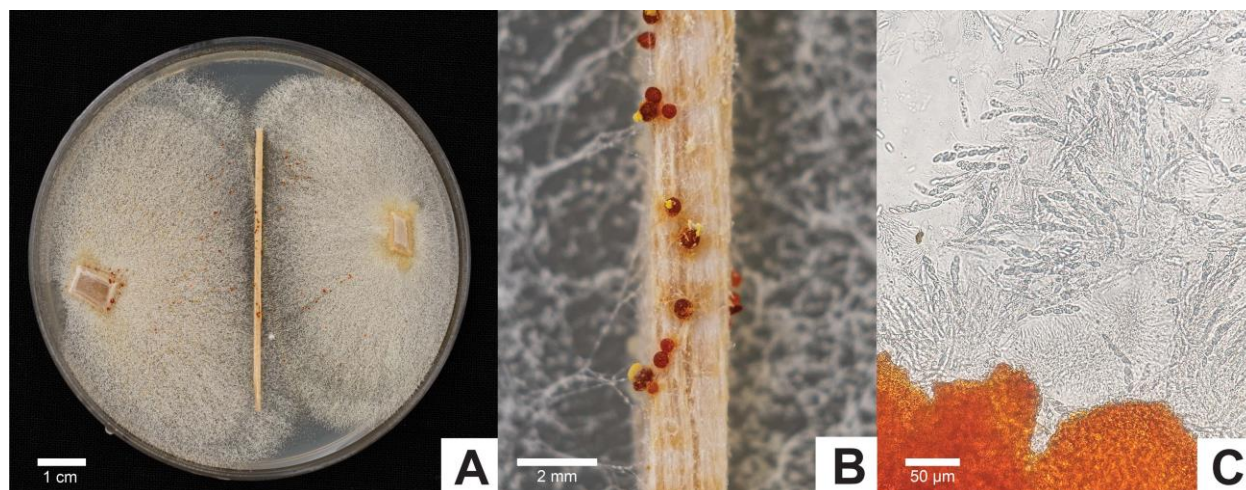

734  
735 Figure 2: *In vitro* mating assay for *Neonectria* spp. and related fungi: A) Approximately  
736 5mm x 5mm colonized plugs of confirmed MAT1-1 and/or MAT1-2 strains placed on  
737 either side of a sterile wooden toothpick placed upon GYE media; B) Perithecia exuding  
738 ascospores on toothpick after approximately 12 weeks; C) Perithecia squash mount  
739 showing ascospores within asci. *Nectria magnoliae* shown in figure. Individual scale  
740 bars are included in each panel.  
741

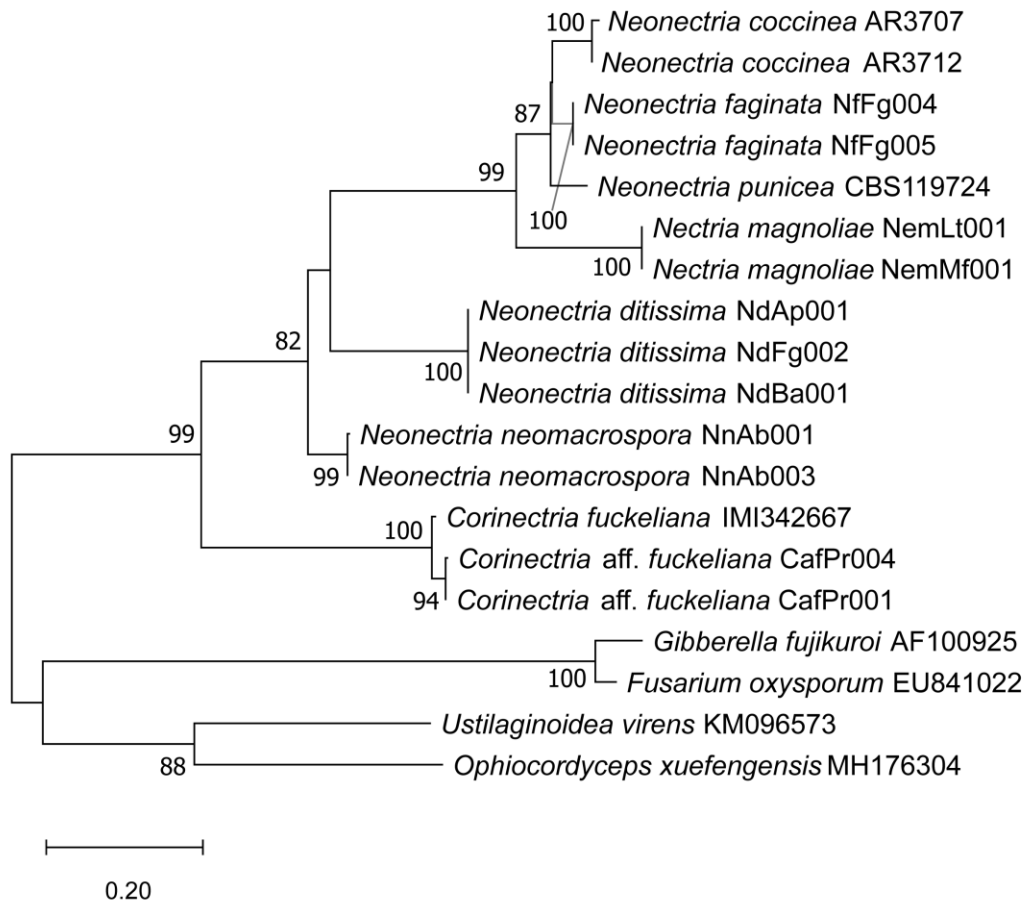

742

743 Figure 3: Phylogenetic relationships of *Neonectria* spp. and related fungi based on  
744 MAT1-1-1 gene sequence data. The phylogeny was inferred using a Maximum  
745 Likelihood analysis based on the Kimura 2-parameter model with gamma distribution  
746 (K2+G) and 1000 bootstrap replicates. Bootstrap values > 70% are given at the nodes.  
747 Branch lengths represent the number of substitutions per site. Outgroup includes  
748 *Ophiocordyceps xuefengensis* and *Ustilaginoidea virens*.

749

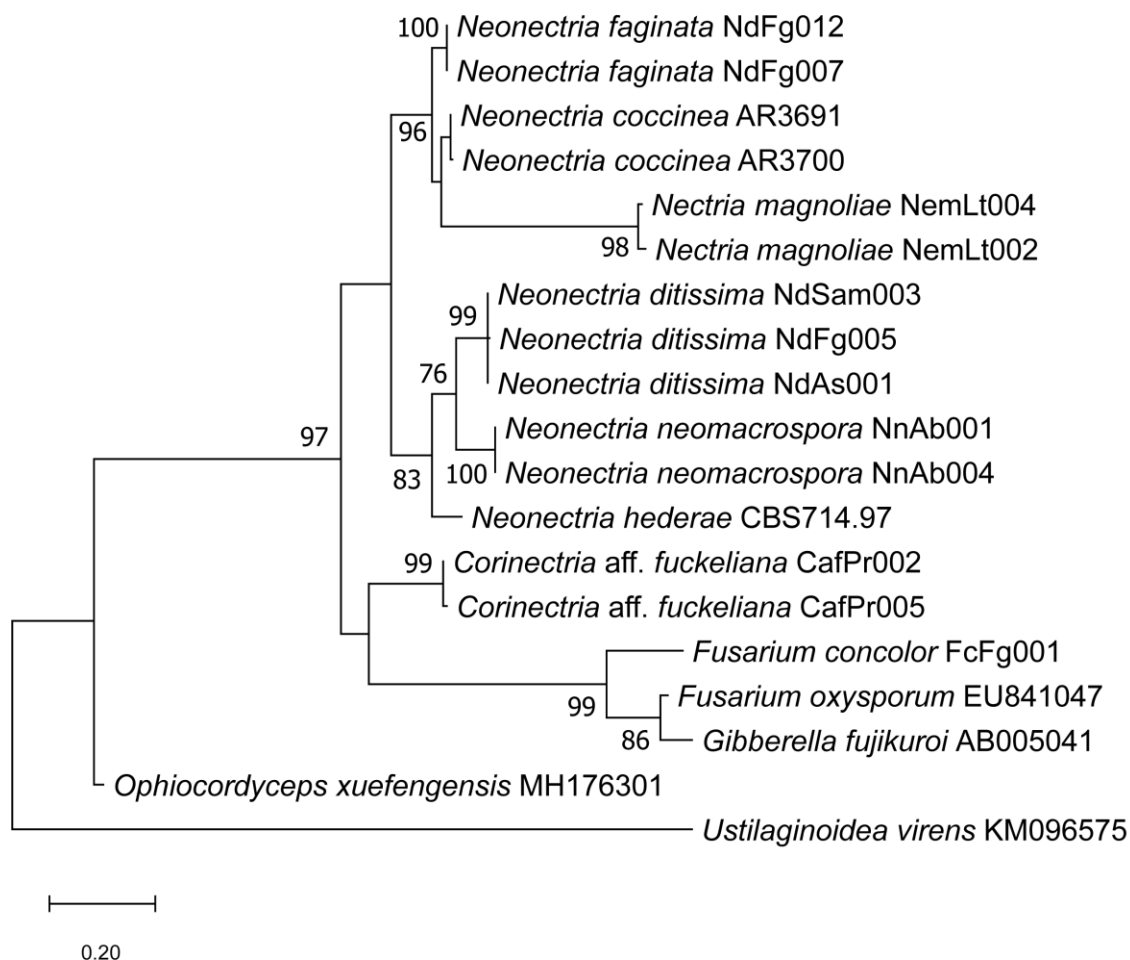

750  
751 Figure 4: Phylogenetic relationships of *Neonectria* spp. and related fungi based on  
752 MAT1-2-1 gene sequence data. The phylogeny was inferred using a Maximum  
753 Likelihood analysis based on the Kimura 2-parameter model with gamma distribution  
754 (K2+G) and 1000 bootstrap replicates. Bootstrap values > 70% are given at the nodes.  
755 Branch lengths represent the number of substitutions per site. Outgroup includes  
756 *Ophiocordyceps xuefengensis* and *Ustilaginoidea virens*.

757



MAT1-1-1

```
Nef 1 LLPEDFPGEDENCFLGSHDFSLVEGHFQKQVGTGROGGLLRARRNMSGQHPATLPRHRLFEHGHHPSSLAVLRMD-CVROGWPLRCHQGRVH
Nec 1 LLPEDFPGSDENCFLGSHDFSLVEGHFQKQVGTGRRGLLRARRNRSGQHPAMPALPRHRWLHHGHHPSSVLGDLRMD-CLRR-WPQRCQGRVH
Nep 1 LLPEGFPGEDENCFLGSHDFSLVEGHFQKQVGTGROGGLLRARR-NMSGQHPVNLPRRCLLHHGNHSPSTVDDLMD-CVROGWPLRCHQGRVH
Necm 1 LLPENIPGAPDENCFLGSHDFSLVQGHVQKQVGTGROGGLLRAGRDRPEQHPDTPRHCVSEHGHHPSSVPCGLRMDGAVRRGRPRRRQGRVG
Ned 1 LLPEAVPRRFNENCFLGSHDFSLVAGPFQKQVGTGRRGLLRAGRGMNQHIFVALSRCLLPRDENHSSCFLLGRLRDCSVRG-RSLRSCSGRRR
Nen 1 LLLEAVPRPPAENCFLGSHDFSLVAGPFQKQVGTGRRGLLRRT-RSWPEQHQPALS-CLLPRHEHYPAQPLLGHLLMDRSVRRERSLRPRPGRRR
Cof 1 LLHETSPGPAEDDCISPLNPSLEPRHFQKQVGTDRGSLLLREG-DWQEQHILGTLSCFLSCHEHCPPYPLHFCRLRVDSSARR-RSYP-HSCTAH
Coaf 1 LLHETSPGPAEDDCISPLNPSLEPRHFQKQVGTDRGSLLLREG-NWQEQHILVTLSRFLSCHEHCSPYPLHFCRLRVDSSARR-RSYP-RSCTAH
Fuo 1 LLSEALPRHPAEDCLRFPPSALGRRSPKQMGPDCS-LFLSPR-STRQEYRLVRIPWYRPFDEHG-TLLVYGPWLAANCFRRHDDISAKHCHEG
Usv 1 LLSEDP-CSAKNCVWIFDHPVEQGSVPK-MGVDSQSLLLRSR--NRQRSASIFPWVLLPCHGNCRTSCVCSPRMVSNGNRLSKTGSRSSNSX
Opx 1 LLFEASRRAAKDCFWVSHHLAQRVQKQVGDCEGLFRTRSNWQRSSESGIFHEPCLSYHEHHRARCVERAGMVCPRRWIAEATPRRIFFK
cons 1 LL E vpg paenCFgs d sl gpfqKqvgt rqqlllr r w qhf lpr l rhehh vp lrmd vrr r r h gr r
```

MAT1-2-1

```
Nef 1 KIPRPPNAYILYRKDRHRLVKASRPDIHNNIDICESLDFDTTDFLSARILGRAWNKESAEIRLYKLRADDEI
Nec 1 -----PNAYILYRKDRHRLVKASRPDIHNNIDICESLDFLGN-NHLFFSS--HSPGLEEQGVRDQTVQVQAS
Necm 1 -----PNAYILYRKDRHRLVKASRPDIHNNIDICESLDFLGN-NHLFFSS--HSPGLEEQGVRDQTVQVQAS
Ned 1 KIPRPPNAYILYRKDRHRLVKAGRPDIHNEICESDEVLLCGIKTDFFS--NSRSRLEQRVC-CQTQVQDQS
Nen 1 -----PNAYILYRKDRHRLVKAGRPDIHNEICES--VFNRG-TTNFFSP--NSRSRLEQRVC-CQTQVQDQS
Neh 1 KIPRPPNAYILYRKDRHRLVKAGRPDIHNEICESHYDFNREITDFYS--NFWSCLEQGVG-CQTQVQDQS
Coaf 1 -----PNAYILYRKDRHRLVKAGRPDIHNEICESCLNVLNCEITLTFISD-NWTSLE-----PRDQSQT
Fuo 1 -----PNAYILYRKDRHRLVKAGRPDIHNEICESKVMTCRTPKLCPRS-----LADFGTLRPVFEPTTSTG
Fuo 1 KIPRPPNAYILYRKDRHRLVKAGRPDIHNEICESKVMTCRTPKLCPRS-----LADFGTLRPVFEPTTSTG
Usv 1 KIPRPPNAYILYRKDRHRLVKAGRPDIHNEICESKVMTCRTPKLCPRS-----LADFGTLRPVFEPTTSTG
Opx 1 KIPRPPNAYILYRKDRHRLVKAGRPDIHNEICESKVMTCRTPKLCPRS-----LADFGTLRPVFEPTTSTG
cons 1 k i p r p p n a y i l y r k d r h r l v k a g r p d i h n n e i c e s l f n i s w l e i k
```

758

759 Figure 5: MAT1-1-1 and MAT1-2-1 amino acid alignments including a selection of study

760 fungal species. Name abbreviations are as follows: *Nef* = *Neonectria faginata*; *Nec* =

761 *Neonectria coccinea*; *Nep* = *Neonectria puncea*; *Necm* = *Nectria magnoliae*; *Ned* =

762 *Neonectria ditissima*; *Nen* = *Neonectria neomacrospora*; *Neh* = *Neonectria hederiae*;

763 *Cof* = *Corinectria fuckeliana*; *Coaf* = *Corinectria aff. fuckeliana*; *Fuo* = *Fusarium*

764 *oxysporum*; *Usv* = *Ustilaginoidea virens*; *Opx* = *Ophiocordyceps xuefengensis*; *Cons* =

765 consensus. Uppercase letters within the consensus sequence represent positions with

766 identical amino acids. Lower case letters represent positions with similar amino acids.

767 Black shading represents conserved amino acids among 50% or more species. Grey

768 shading represents shared amino acids with shared characteristics/properties among

769 species.

770



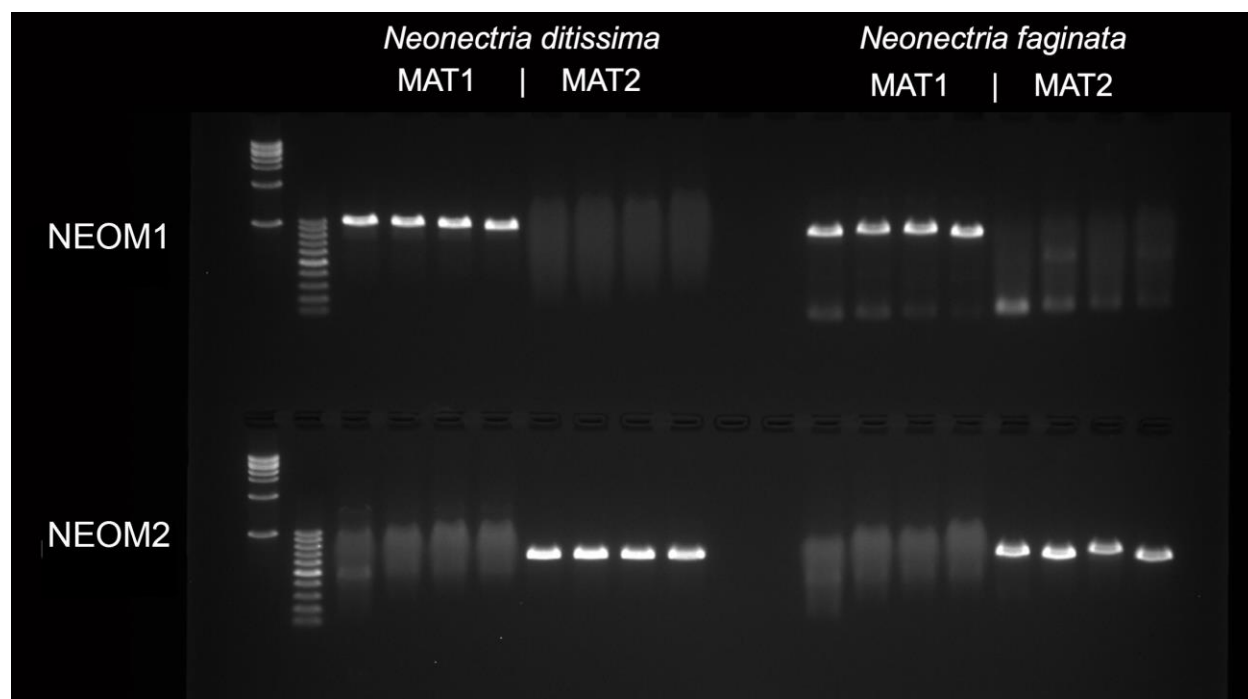

771

772 Supplemental Figure 1: Electrophoresis gel photo demonstrating specific amplification  
773 of MAT1-1-1 and MAT1-2-1 by the genus-level primer pair (NeoM1f/r and NeoM2f/r) for  
774 both *N. ditissima* and *N. faginata*.
